# Supplementary material for: Using time-of-flight secondary ion mass spectrometry (ToF-SIMS) and matrix assisted laser desorption/ionization mass spectrometry (MALDI-MS) for investigations on single hair samples to solve the contamination versus incorporation issue of hair analysis in the case of cocaine and methadone
Source: Royal Society of Chemistry journal article supplement (doi:10.1039/c9an02577d), 2020-01-01
Supplement: c9an02577d1.pdf [file c9an02577d1.pdf]

## **Electronic supplementary information**

### **Using time-of-flight secondary ion mass spectrometry (ToF-SIMS) and matrix assisted laser desorption/ionization mass spectrometry (MALDI-MS) for investigations on single hair samples to solve the contamination versus incorporation issue of hair analysis in case of cocaine and methadone**

Erne Robert<sup>1</sup>, Bernard Laetitia<sup>2</sup>, Kawecki Maciej<sup>2</sup>, Baumgartner Markus R.<sup>1</sup> and Kraemer Thomas<sup>1</sup>

1: Department of Forensic Pharmacology & Toxicology, Zurich Institute of Forensic Medicine (ZIFM), University of Zurich, Winterthurerstrasse 190/52, CH-8057, Zurich, Switzerland

2: Laboratory for Nanoscale Materials Science, Empa, Ueberlandstrasse 129, CH-8600 Duebendorf, Switzerland

**Table S1: Concentrations of the given analytes and concentration ratios of the given analytes/metabolites for the hair samples and if available for the wash solutions. Upper part: Results from the hair samples of the volunteers of the heavy contamination experiment. Bottom part: Results of from the routine hair samples with the given cocaine concentrations. Abbreviations: Bec, benzoylecgonine; CE, cocaethylene; Coc, cocaine; m-OH-Bec, meta hydroxybenzoylecgonine; m-OH-COC, meta hydroxycocaine; Noc, norcocaine; p-OH-Bec, para hydroxybenzoylecgonine; p-OHCOC, para-hydroxycocaine; seg, segment. Decision criteria for classification as consumption (from ref.8):  $Bec/Coc > 0.05$ ;  $Noc/Coc > 0.01$ ;  $pOHCoc/Coc > 0.001$ ;  $mOHCoc/Coc > 0.001$ ;  $pOHBec/Coc > 0.0002$ ;  $mOHBec/COC > 0.0002$ . According to this decision model, a sample is reported as positive and consistent with predominant cocaine use, if  $COC \geq 500$  pg/mg and at least two of the three criteria are fulfilled.**

**Volunteer1**

|                     | hair          |        |       |       |        |       |     | wash solution |         |            |            |                |            |            |             |     |               |
|---------------------|---------------|--------|-------|-------|--------|-------|-----|---------------|---------|------------|------------|----------------|------------|------------|-------------|-----|---------------|
|                     | conc. [pg/mg] |        |       |       |        |       |     | ratio         |         |            |            | conc. [pg/mg]* |            |            | ratio       |     |               |
|                     | pOHCOC        | mOHCOC | pOHBE | mOHBE | Coc    | Bec   | Noc | Bec/Coc       | Noc/Coc | pOHCoc/Coc | mOHCoc/Coc | pOHBec/Coc     | mOHBec/Coc | Coc        | Bec         | Noc | Noc/(Coc+Bec) |
| <b>before</b>       | 0             | 0      | 0     | 0     | 0      | 0     | 0   |               |         |            |            |                |            | 0          | 0           | 0   |               |
| <b>1 week after</b> | 0.8           | 1.0    | 0.0   | 0.0   | 4'100  | 130   | 30  | 0.0317        | 0.0073  | 0.0002     | 0.0002     | 0.0000         | 0.0000     | < LOQ (34) | < LOQ (4)   | 0.6 | 0.0158        |
| <b>3 week after</b> | 5             | 8      | 0.0   | 0.6   | 16'000 | 1'400 | 78  | 0.0875        | 0.0049  | 0.0003     | 0.0005     | 0.0000         | 0.0000     | 165        | < LOQ (9.5) | 2   | 0.0115        |
| <b>8 week after</b> | 10            | 17     | 1.4   | 1.6   | 13'000 | 1'300 | 82  | 0.1000        | 0.0063  | 0.0008     | 0.0013     | 0.0001         | 0.0001     | 58         | 10          | 1   | 0.0147        |

**Volunteer 2**

|                     | hair          |        |       |       |       |     |     | wash solution |         |            |            |                |            |            |             |              |               |
|---------------------|---------------|--------|-------|-------|-------|-----|-----|---------------|---------|------------|------------|----------------|------------|------------|-------------|--------------|---------------|
|                     | conc. [pg/mg] |        |       |       |       |     |     | ratio         |         |            |            | conc. [pg/mg]* |            |            | ratio       |              |               |
|                     | pOHCOC        | mOHCOC | pOHBE | mOHBE | Coc   | Bec | Noc | Bec/Coc       | Noc/Coc | pOHCoc/Coc | mOHCoc/Coc | pOHBec/Coc     | mOHBec/Coc | Coc        | Bec         | Noc          | Noc/(Coc+Bec) |
| <b>before</b>       | 0             | 0      | 0     | 0     | 0     | 0   | 0   |               |         |            |            |                |            | 0          | 0           | 0            |               |
| <b>1 week after</b> | 0.8           | 1.0    | 0     | 0     | 5'400 | 200 | 49  | 0.0370        | 0.0091  | 0.0001     | 0.0002     | 0.0000         | 0.0000     | 150        | < LOQ (18)  | 2            | 0.0119        |
| <b>3 week after</b> | 0.6           | 0.6    | 0     | 0     | 2'200 | 140 | 9   | 0.0636        | 0.0041  | 0.0003     | 0.0003     | 0.0000         | 0.0000     | 168        | < LOQ (8.5) | < LOQ (0.4)  | 0.0023        |
| <b>8 week after</b> | 0.6           | 0.7    | 0     | 0     | 810   | 60  | 3   | 0.0741        | 0.0037  | 0.0007     | 0.0009     | 0.0000         | 0.0000     | < LOQ (11) | < LOQ (2.5) | < LOQ (0.25) | 0.0185        |

\*LOQ: Coc = 50 pg/mg, Bec = 10 pg/mg, Noc = 0.5 pg/mg

hair sample with 100'000 pg cocaine per mg

|       | conc. [pg/mg] |        |       |       |         |       |       | ratio   |         |            |            |            |            |
|-------|---------------|--------|-------|-------|---------|-------|-------|---------|---------|------------|------------|------------|------------|
|       | pOHCOC        | mOHCOC | pOHBE | mOHBE | Coc     | Bec   | Noc   | Bec/Coc | Noc/Coc | pOHCoc/Coc | mOHCoc/Coc | pOHBeC/Coc | mOHBeC/Coc |
| Seg 1 | 140           | 190    | 27    | 8     | 101'000 | 7'700 | 1'100 | 0.0762  | 0.0109  | 0.0014     | 0.0019     | 0.0003     | 0.0001     |

hair sample with 180'000 pg cocaine per mg

|       | conc. [pg/mg] |        |       |       |         |        |       | ratio   |         |            |            |            |            |
|-------|---------------|--------|-------|-------|---------|--------|-------|---------|---------|------------|------------|------------|------------|
|       | pOHCOC        | mOHCOC | pOHBE | mOHBE | Coc     | Bec    | Noc   | Bec/Coc | Noc/Coc | pOHCoc/Coc | mOHCoc/Coc | pOHBeC/Coc | mOHBeC/Coc |
| Seg 1 | 240           | 460    | 88    | 42    | 174'000 | 23'000 | 3'000 | 0.1322  | 0.0172  | 0.0014     | 0.0026     | 0.0005     | 0.0002     |

hair sample with 10'000 pg cocaine per mg

|       | conc. [pg/mg] |        |       |       |        |     |     | ratio   |         |            |            |            |            |
|-------|---------------|--------|-------|-------|--------|-----|-----|---------|---------|------------|------------|------------|------------|
|       | pOHCOC        | mOHCOC | pOHBE | mOHBE | Coc    | Bec | Noc | Bec/Coc | Noc/Coc | pOHCoc/Coc | mOHCoc/Coc | pOHBeC/Coc | mOHBeC/Coc |
| Seg 1 | 21            | 26     | 4     | 2     | 10'200 | 760 | 140 | 0.0745  | 0.0137  | 0.0021     | 0.0025     | 0.0004     | 0.0002     |
